# Supplementary material
Source: publisher figshare collection journal article supplement (https://gsapubs.figshare.com/articles/dataset/_/14700069)
Supplement: Supplementary file 1 [file 1]

Zi, J.W., Sheppard, S., Muhling, J.R., and Rasmussen, B., 2021, Refining the Paleoproterozoic tectonothermal history of the Penokean Orogen: New U-Pb age constraints from the Pembine-Wausau terrane, Wisconsin, USA: GSA Bulletin, <https://doi.org/10.1130/B36114.1>.

## Supplemental Material

**Figure S1.** Petrographic photomicrographs of the studied rocks

**Figures S2–S4.** Backscattered electron (BSE) images of dated zircon grains

**Table S1.** Summary of locations, descriptions and geochronology results of dated samples

**Table S2.** SHRIMP setup and operating parameters for all analytical sessions

**Table S3–S7.** SHRIMP U-Pb data tables

**Table S8–S11.** Chlorite chemistry data tables

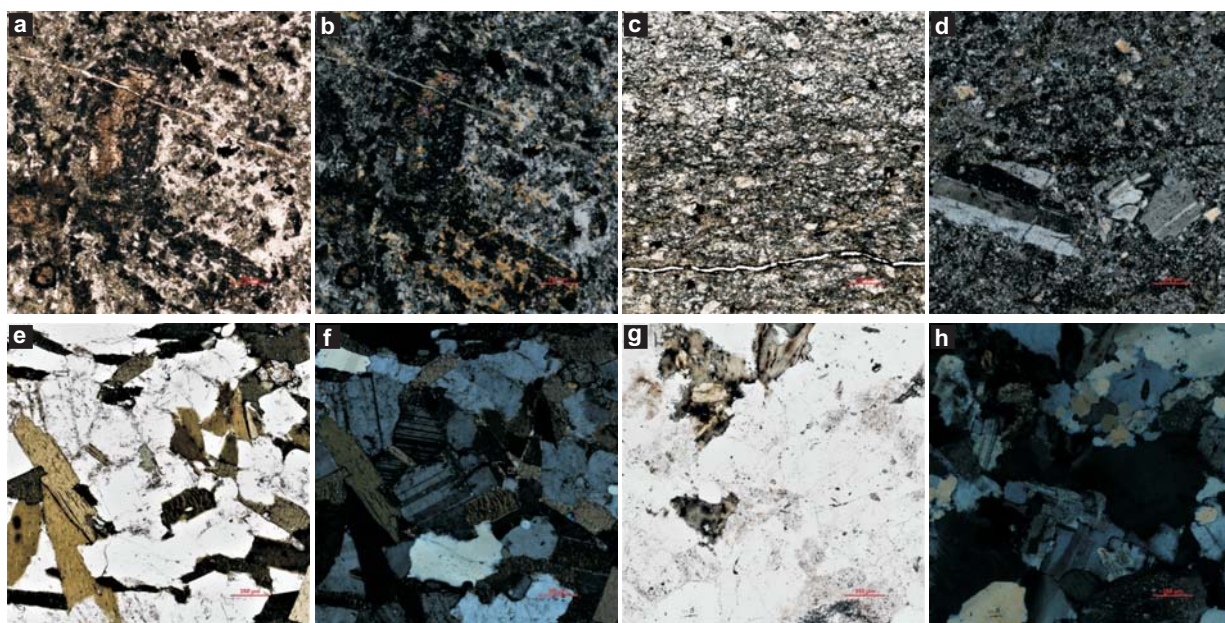

**Fig. S1** Petrographic photomicrographs of the meta-rhyodacite (a-b) and meta-dacite (c-d) of the Beecher Formation, and tonalitic intrusive rocks of the Dunbar Gneiss (e-f) and the Newingham Tonalite (g-h), under plane polarized light (a, c, e, g) and cross polarized light (b, d, f, h).

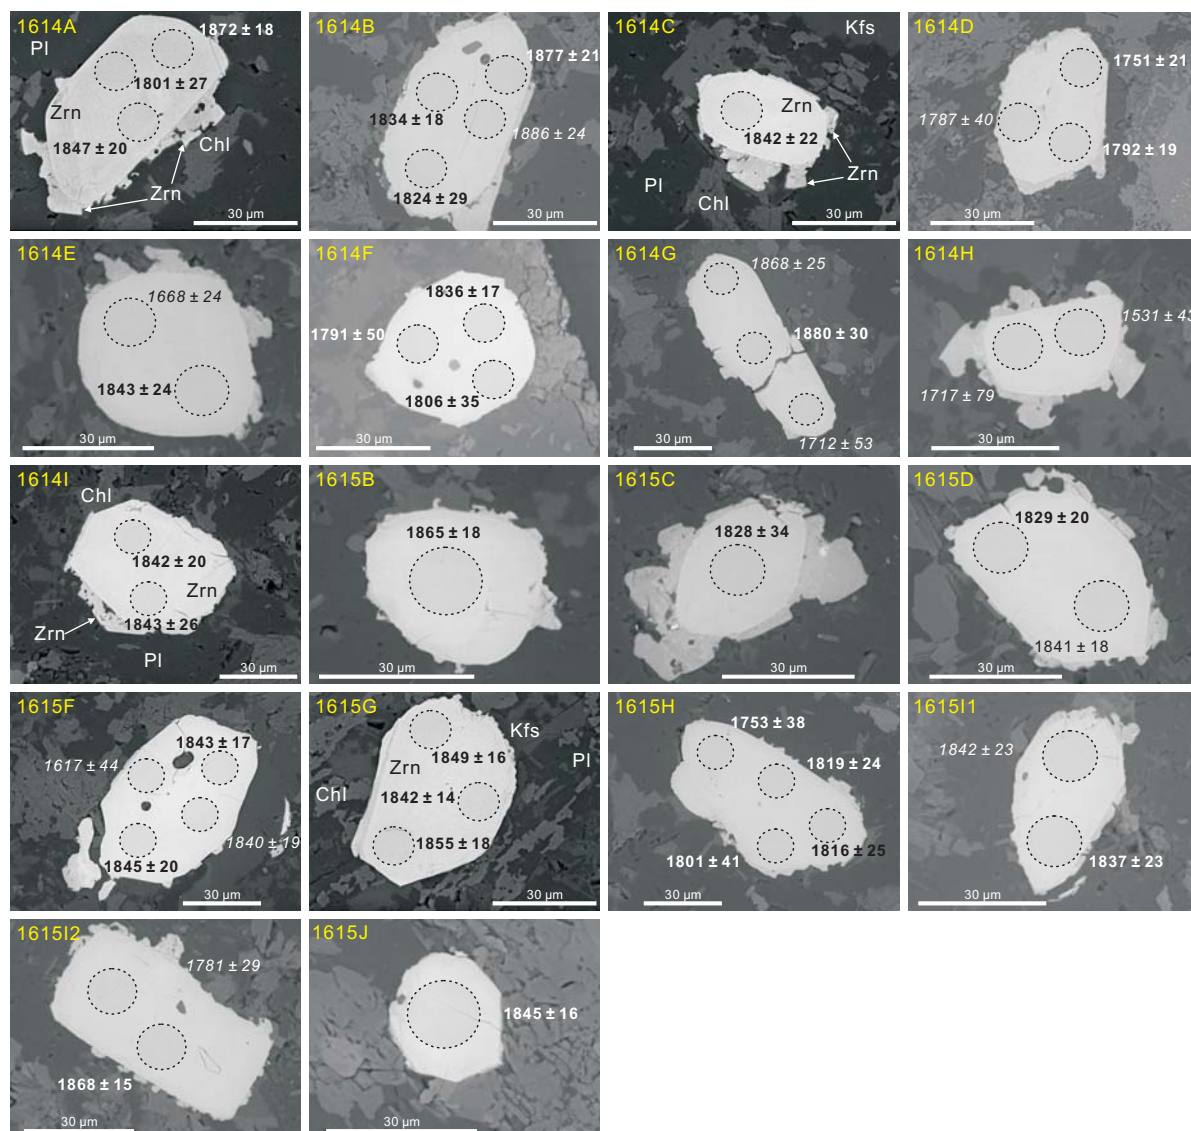

**Fig. S2** Backscattered electron images of dated zircon grains from the Beecher Formation meta-rhyodacite (190615-2). Dashed circles represent SHRIMP analytical spots. The  $^{207}\text{Pb}/^{206}\text{Pb}$  date (with  $1\sigma$  error) is given next to each spot. Dates in *italic* record  $>5\%$  discordance or  $>1\%$  common Pb correction and are considered unreliable.

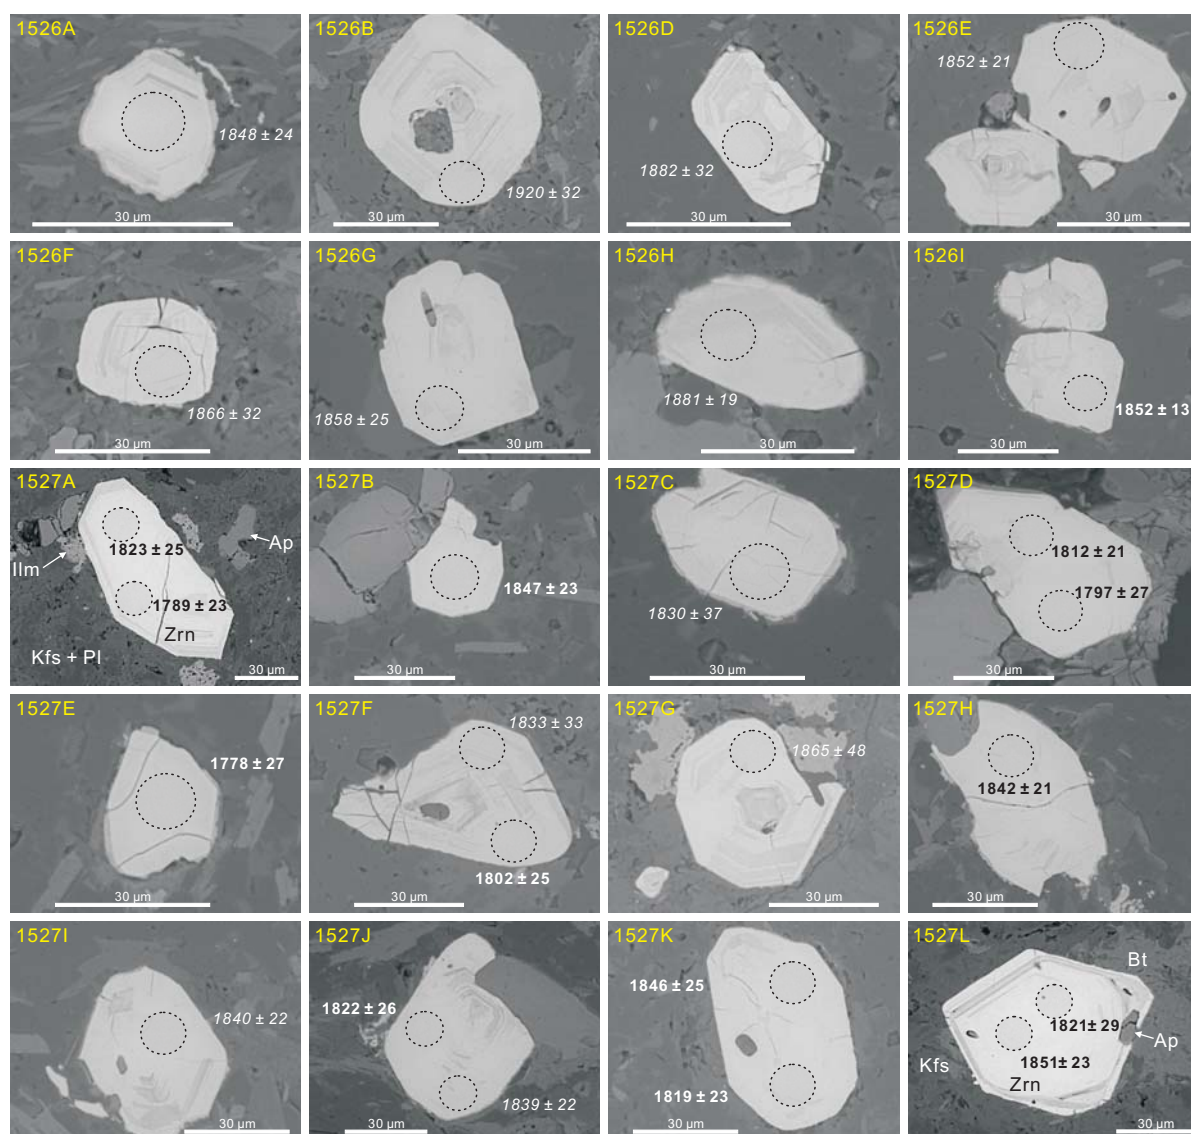

**Fig. S3** Backscattered electron images of dated zircon grains from the Beecher Formation meta-dacite (190615-4). Other notes as in Fig. S2.



### Dunbar Gneiss (190615-5)

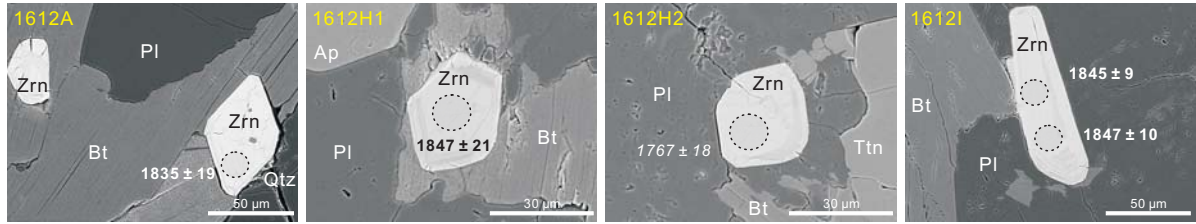

### Newingham Tonalite (190615-6)

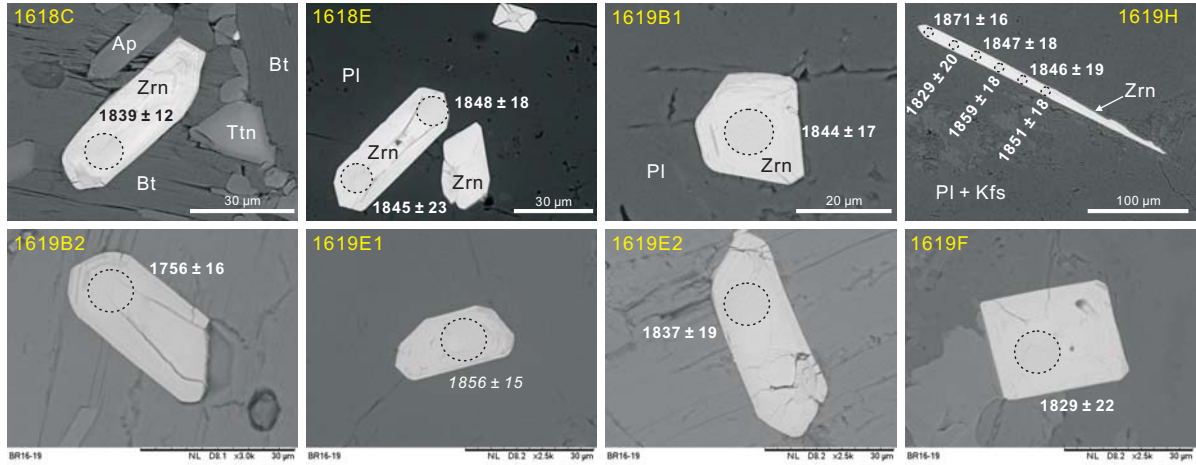

**Fig. S4** Backscattered electron images of dated zircon grains from the Dunbar Gneiss (190615-4) and Newingham Tonalite (190615-6). Other notes as in Fig. S2.

**TABLE S1. SUMMARY OF LOCATIONS, DESCRIPTIONS AND GEOCHRONOLOGY RESULTS OF DATED SAMPLES**

| Sample ID | Location (datum<br>= NAD 1983) | Stratigraphic<br>unit | Description                                                                                                                                                                                                             | Geochronology results                            |
|-----------|--------------------------------|-----------------------|-------------------------------------------------------------------------------------------------------------------------------------------------------------------------------------------------------------------------|--------------------------------------------------|
| 190615-2  | -88.074522°<br>45.563108°      | Beecker<br>Formation  | Massive, gray, porphyritic meta-rhyodacite; strong static recrystallization evident in thin section; abundant secondary sericite and epidote; sample is free of inclusions or veins                                     | 1845 ± 7 Ma (zircon)<br>1775 ± 23 Ma (zircon)    |
| 190615-4  | -87.855219°<br>45.564458°      | Beecker<br>Formation  | Pale grey meta-dacite; plagioclase crystals up to a few millimeters in diameter in parts, locally crystal rich; in part medium-bedded, thinly laminated; strongly recrystallized; sample is free of inclusions or veins | 1780-1850 Ma (zircon)<br>1775 ± 25 Ma (monazite) |
| 190615-5  | -88.198939°<br>45.679753°      | Dunbar<br>Gneiss      | Weakly foliated, medium- to coarse-grained, porphyritic metatonalite or metagranodiorite; low-strain outcrop free of inclusions or veins; medium-grade metamorphic overprint evident in thin section                    | 1845 ± 7 Ma (zircon)<br>1783 ± 14 Ma (zircon)    |
| 190615-6  | -88.039181°<br>45.623064°      | Newingham<br>Tonalite | Massive to weakly foliated, pale grey metagranodiorite to metatonalite; sample is free of veins or inclusions; medium-grade metamorphic overprint evident in thin section                                               | 1847 ± 10 Ma (zircon)                            |

**TABLE S2. SHRIMP SETUP AND OPERATING PARAMETERS FOR ALL ANALYTICAL SESSIONS**

| Session | Mount ID                      | Sample ID                        | Mineral  | Kohler aperture (μm) | Primary spot size (μm) | Intensity of O <sub>2</sub> <sup>-</sup> primary beam (nA) | Mass resolution M/ΔM (1%) | Number of scans | Number of Pb/U standard | Pb/U standard & external precision (1σ, %) | <sup>207</sup> Pb/ <sup>206</sup> Pb IMF reference (observed value) |
|---------|-------------------------------|----------------------------------|----------|----------------------|------------------------|------------------------------------------------------------|---------------------------|-----------------|-------------------------|--------------------------------------------|---------------------------------------------------------------------|
| 1       | BR15-26                       | 190615-4                         | Zircon   | 50                   | 12                     | -0.4                                                       | 5060                      | 8               | 11/11                   | BR266 (1.44)                               | OG1 (3460 ± 7 Ma, <i>n</i> = 6)                                     |
| 2       | BR15-30                       | 190615-4                         | Monazite | 50                   | 12                     | -0.5                                                       | 5500                      | 8               | 15/16                   | French (1.00)                              | Z2908 (1794 ± 6 Ma, <i>n</i> = 6)                                   |
| 3       | BR15-30                       | 190615-4                         | Monazite | 30                   | 10                     | -0.3                                                       | 5000                      | 8               | 10/13                   | French (4.27)                              | Z2908 (1788 ± 7 Ma, <i>n</i> = 5)                                   |
| 4       | BR16-14<br>BR16-15<br>BR16-18 | 190615-2<br>190615-2<br>190615-6 | Zircon   | 50                   | 12                     | -0.7                                                       | 5500                      | 7               | 13/15                   | BR266 (1.00)                               | OG1 (3456 ± 8 Ma, <i>n</i> = 9)                                     |
| 5       | BR16-11<br>BR16-12<br>BR16-18 | 190615-5<br>190615-5<br>190615-6 | Zircon   | 30                   | 10                     | -0.4                                                       | 5400                      | 8               | 13/17                   | BR266 (2.26)                               | OG1 (3469 ± 7 Ma, <i>n</i> = 10)                                    |
| 6       | BR15-27<br>BR16-19            | 190615-4<br>190615-6             | Zircon   | 50                   | 12                     | -0.5                                                       | 5170                      | 8               | 21/22                   | BR266 (1.00)                               | OG1 (3467 ± 8 Ma, <i>n</i> = 7)                                     |

**TABLE S3. SHRIMP U-PB DATA FOR ZIRCON IN META-RHYODACITE SAMPLE 190615-2 FROM THE BEECHER FORMATION**

| Analysis No.                                                                                         | U (ppm) | Th (ppm) | Th/U | $f_{206}$ (%) <sup>*</sup> | $^{207}\text{Pb}/^{206}\text{Pb}^{\dagger}$ | $\pm 1\sigma$ | $^{206}\text{Pb}/^{238}\text{U}$ | $\pm 1\sigma$ | $^{207}\text{Pb}/^{235}\text{U}$ | $\pm 1\sigma$ | $^{208}\text{Pb}/^{232}\text{Th}$ | $\pm 1\sigma$ | Disc. (%) <sup>§</sup> | $^{207}\text{Pb}/^{206}\text{Pb}$<br>Age (Ma) | $\pm 1\sigma$ |
|------------------------------------------------------------------------------------------------------|---------|----------|------|----------------------------|---------------------------------------------|---------------|----------------------------------|---------------|----------------------------------|---------------|-----------------------------------|---------------|------------------------|-----------------------------------------------|---------------|
| <b><i>Main group (<math>1842 \pm 7</math> Ma, <math>n = 32</math>, <math>MSWD = 0.98</math>)</i></b> |         |          |      |                            |                                             |               |                                  |               |                                  |               |                                   |               |                        |                                               |               |
| 1614G.1-3                                                                                            | 112     | 20       | 0.18 | -0.15                      | 0.1150                                      | 0.0019        | 0.323                            | 0.006         | 5.12                             | 0.12          | 0.097                             | 0.005         | 4                      | 1880                                          | 30            |
| 1614B.1-4                                                                                            | 247     | 57       | 0.23 | 0.11                       | 0.1148                                      | 0.0014        | 0.323                            | 0.006         | 5.12                             | 0.11          | 0.084                             | 0.003         | 4                      | 1877                                          | 21            |
| 1614A.1-2                                                                                            | 303     | 74       | 0.25 | -0.06                      | 0.1145                                      | 0.0011        | 0.327                            | 0.008         | 5.16                             | 0.14          | 0.100                             | 0.003         | 3                      | 1872                                          | 18            |
| 1615I.1-2a                                                                                           | 508     | 163      | 0.32 | -0.05                      | 0.1143                                      | 0.0010        | 0.337                            | 0.007         | 5.31                             | 0.12          | 0.098                             | 0.003         | 0                      | 1868                                          | 15            |
| 1615B.1-1                                                                                            | 304     | 91       | 0.30 | 0.00                       | 0.1140                                      | 0.0011        | 0.321                            | 0.004         | 5.05                             | 0.08          | 0.093                             | 0.002         | 4                      | 1865                                          | 18            |
| 1615G.1-3                                                                                            | 379     | 63       | 0.17 | 0.10                       | 0.1134                                      | 0.0012        | 0.322                            | 0.007         | 5.03                             | 0.13          | 0.089                             | 0.004         | 3                      | 1855                                          | 18            |
| 1615G.1-1                                                                                            | 422     | 82       | 0.19 | 0.10                       | 0.1131                                      | 0.0010        | 0.341                            | 0.019         | 5.32                             | 0.30          | 0.088                             | 0.006         | -2                     | 1849                                          | 16            |
| 1614A.1-3                                                                                            | 313     | 78       | 0.25 | -0.13                      | 0.1129                                      | 0.0013        | 0.326                            | 0.007         | 5.07                             | 0.12          | 0.096                             | 0.004         | 2                      | 1847                                          | 20            |
| 1615J.1-1                                                                                            | 442     | 140      | 0.32 | 0.10                       | 0.1128                                      | 0.0010        | 0.327                            | 0.004         | 5.09                             | 0.08          | 0.092                             | 0.002         | 1                      | 1845                                          | 16            |
| 1615F.1-2                                                                                            | 248     | 60       | 0.24 | -0.04                      | 0.1128                                      | 0.0012        | 0.328                            | 0.006         | 5.10                             | 0.11          | 0.098                             | 0.003         | 1                      | 1845                                          | 20            |
| 1615F.1-1                                                                                            | 382     | 111      | 0.29 | 0.03                       | 0.1127                                      | 0.0011        | 0.333                            | 0.004         | 5.18                             | 0.08          | 0.096                             | 0.002         | -1                     | 1843                                          | 17            |
| 1614I.1-2                                                                                            | 494     | 105      | 0.21 | 0.02                       | 0.1127                                      | 0.0016        | 0.319                            | 0.004         | 4.95                             | 0.09          | 0.089                             | 0.002         | 3                      | 1843                                          | 26            |
| 1614E.1-2                                                                                            | 238     | 56       | 0.23 | 0.31                       | 0.1127                                      | 0.0015        | 0.329                            | 0.005         | 5.12                             | 0.10          | 0.085                             | 0.004         | 0                      | 1843                                          | 24            |
| 1614C.1-2                                                                                            | 290     | 67       | 0.23 | 0.14                       | 0.1126                                      | 0.0013        | 0.344                            | 0.033         | 5.34                             | 0.51          | 0.087                             | 0.009         | -3                     | 1842                                          | 22            |
| 1615G.1-2                                                                                            | 667     | 157      | 0.23 | 0.07                       | 0.1126                                      | 0.0009        | 0.331                            | 0.008         | 5.15                             | 0.13          | 0.088                             | 0.003         | 0                      | 1842                                          | 14            |
| 1614I.1-1                                                                                            | 307     | 78       | 0.26 | 0.09                       | 0.1126                                      | 0.0012        | 0.320                            | 0.010         | 4.97                             | 0.16          | 0.094                             | 0.004         | 3                      | 1842                                          | 20            |
| 1615D.1-2                                                                                            | 268     | 72       | 0.27 | 0.00                       | 0.1125                                      | 0.0011        | 0.323                            | 0.005         | 5.01                             | 0.08          | 0.091                             | 0.004         | 2                      | 1841                                          | 18            |
| 1614I.2-2                                                                                            | 290     | 68       | 0.24 | 0.20                       | 0.1124                                      | 0.0014        | 0.313                            | 0.004         | 4.86                             | 0.09          | 0.081                             | 0.003         | 4                      | 1838                                          | 22            |
| 1615I.1-2                                                                                            | 252     | 80       | 0.32 | 0.19                       | 0.1123                                      | 0.0014        | 0.330                            | 0.007         | 5.11                             | 0.12          | 0.092                             | 0.004         | 0                      | 1837                                          | 23            |
| 1614F.1-2                                                                                            | 493     | 166      | 0.34 | 0.13                       | 0.1123                                      | 0.0011        | 0.320                            | 0.004         | 4.95                             | 0.08          | 0.087                             | 0.003         | 3                      | 1836                                          | 17            |
| 1614B.1-2                                                                                            | 342     | 89       | 0.26 | 0.05                       | 0.1121                                      | 0.0011        | 0.328                            | 0.006         | 5.07                             | 0.11          | 0.092                             | 0.003         | 0                      | 1834                                          | 18            |
| 1615D.1-1                                                                                            | 313     | 86       | 0.28 | 0.12                       | 0.1118                                      | 0.0012        | 0.315                            | 0.004         | 4.86                             | 0.08          | 0.085                             | 0.002         | 3                      | 1829                                          | 20            |
| 1615C.1-1                                                                                            | 226     | 49       | 0.22 | 0.19                       | 0.1117                                      | 0.0021        | 0.325                            | 0.005         | 5.01                             | 0.12          | 0.088                             | 0.005         | 1                      | 1828                                          | 34            |
| 1614B.1-1                                                                                            | 209     | 40       | 0.19 | 0.41                       | 0.1115                                      | 0.0018        | 0.321                            | 0.005         | 4.93                             | 0.11          | 0.080                             | 0.006         | 2                      | 1824                                          | 29            |
| 1615H.1-2                                                                                            | 244     | 68       | 0.28 | 0.13                       | 0.1112                                      | 0.0015        | 0.324                            | 0.008         | 4.96                             | 0.14          | 0.087                             | 0.003         | 1                      | 1819                                          | 24            |
| 1615H.1-4                                                                                            | 186     | 33       | 0.18 | 0.06                       | 0.1110                                      | 0.0015        | 0.338                            | 0.012         | 5.17                             | 0.19          | 0.087                             | 0.007         | -3                     | 1816                                          | 25            |



|                          |      |      |      |       |        |        |       |       |      |      |       |        |    |      |    |
|--------------------------|------|------|------|-------|--------|--------|-------|-------|------|------|-------|--------|----|------|----|
| 1614F.1-3                | 359  | 106  | 0.29 | 0.00  | 0.1104 | 0.0021 | 0.328 | 0.004 | 4.99 | 0.12 | 0.092 | 0.002  | -1 | 1806 | 35 |
| 1614A.1-1                | 169  | 29   | 0.17 | 0.20  | 0.1101 | 0.0016 | 0.325 | 0.007 | 4.93 | 0.13 | 0.087 | 0.005  | -1 | 1801 | 27 |
| 1615H.1-3                | 222  | 39   | 0.18 | 0.00  | 0.1101 | 0.0025 | 0.337 | 0.009 | 5.11 | 0.17 | 0.091 | 0.003  | -4 | 1801 | 41 |
| 1614A.1-4                | 195  | 37   | 0.19 | 0.41  | 0.1098 | 0.0025 | 0.323 | 0.009 | 4.89 | 0.18 | 0.075 | 0.006  | -1 | 1795 | 42 |
| 1614D.1-2                | 413  | 103  | 0.25 | 0.17  | 0.1095 | 0.0011 | 0.323 | 0.009 | 4.87 | 0.14 | 0.083 | 0.004  | -1 | 1792 | 18 |
| 1614F.1-1                | 250  | 59   | 0.24 | 0.22  | 0.1095 | 0.0030 | 0.322 | 0.006 | 4.86 | 0.16 | 0.083 | 0.004  | 0  | 1791 | 50 |
| <i>Young outliers</i>    |      |      |      |       |        |        |       |       |      |      |       |        |    |      |    |
| 1615H.1-1                | 183  | 51   | 0.28 | 0.73  | 0.1073 | 0.0022 | 0.324 | 0.005 | 4.78 | 0.12 | 0.081 | 0.005  | -3 | 1753 | 38 |
| 1614D.1-1                | 382  | 68   | 0.18 | 0.23  | 0.1071 | 0.0012 | 0.322 | 0.006 | 4.75 | 0.10 | 0.079 | 0.004  | -3 | 1751 | 21 |
| <i>Rejected analyses</i> |      |      |      |       |        |        |       |       |      |      |       |        |    |      |    |
| 1614G.1-2                | 301  | 80   | 0.27 | 1.85  | 0.1048 | 0.0030 | 0.295 | 0.007 | 4.27 | 0.16 | 0.067 | 0.008  | 3  | 1712 | 53 |
| 1614D.1-3                | 368  | 84   | 0.23 | 0.14  | 0.1092 | 0.0024 | 0.287 | 0.010 | 4.33 | 0.18 | 0.069 | 0.004  | 9  | 1787 | 40 |
| 1614B.1-3                | 210  | 45   | 0.21 | -0.14 | 0.1154 | 0.0016 | 0.305 | 0.005 | 4.85 | 0.10 | 0.091 | 0.005  | 9  | 1886 | 24 |
| 1614I.1-3                | 272  | 77   | 0.28 | 0.03  | 0.1122 | 0.0019 | 0.292 | 0.007 | 4.52 | 0.13 | 0.085 | 0.003  | 10 | 1835 | 31 |
| 1614I.2-1                | 238  | 52   | 0.22 | 0.25  | 0.1088 | 0.0014 | 0.278 | 0.004 | 4.17 | 0.08 | 0.073 | 0.003  | 11 | 1779 | 24 |
| 1614I.1-4                | 593  | 239  | 0.40 | 0.06  | 0.1118 | 0.0010 | 0.277 | 0.003 | 4.27 | 0.06 | 0.079 | 0.004  | 14 | 1828 | 16 |
| 1615I.1-1a               | 703  | 298  | 0.42 | 0.86  | 0.1089 | 0.0017 | 0.254 | 0.006 | 3.82 | 0.10 | 0.072 | 0.003  | 18 | 1781 | 29 |
| 1614H.1-2                | 283  | 66   | 0.24 | 0.16  | 0.1052 | 0.0045 | 0.240 | 0.003 | 3.48 | 0.16 | 0.069 | 0.002  | 19 | 1717 | 79 |
| 1614C.1-1                | 255  | 121  | 0.47 | 0.54  | 0.1067 | 0.0019 | 0.218 | 0.010 | 3.20 | 0.16 | 0.032 | 0.003  | 27 | 1743 | 32 |
| 1614C.1-3                | 334  | 130  | 0.39 | 0.57  | 0.1037 | 0.0017 | 0.178 | 0.005 | 2.54 | 0.08 | 0.042 | 0.0025 | 38 | 1690 | 30 |
| 1615F.1-4                | 210  | 44   | 0.21 | 0.77  | 0.0996 | 0.0023 | 0.159 | 0.008 | 2.18 | 0.12 | 0.041 | 0.0042 | 41 | 1617 | 44 |
| 1614E.1-1                | 587  | 382  | 0.65 | 0.52  | 0.1024 | 0.0014 | 0.151 | 0.002 | 2.13 | 0.04 | 0.030 | 0.0012 | 46 | 1668 | 24 |
| 1614H.1-1                | 1474 | 1040 | 0.71 | 0.77  | 0.0951 | 0.0022 | 0.108 | 0.003 | 1.42 | 0.05 | 0.023 | 0.0026 | 57 | 1531 | 43 |

*Note:* Analyses are sorted by descending  $^{207}\text{Pb}/^{206}\text{Pb}$  date, except those rejected due to high common Pb or large discordance.

\*  $f_{206}$  is the proportion of common Pb in  $^{206}\text{Pb}$ , determined using the measured  $^{204}\text{Pb}/^{206}\text{Pb}$  and a common Pb composition from the Stacey-Kramers (1975) model at the approximate age of the sample.

† All Pb isotope data and  $t[^{207}\text{Pb}/^{206}\text{Pb}]$  have been corrected for common Pb.

§ Disc. is apparent discordance, as  $100 \cdot (t[^{207}\text{Pb}/^{206}\text{Pb}] - t[^{206}\text{Pb}/^{238}\text{U}]) / t[^{207}\text{Pb}/^{206}\text{Pb}]$ .

**TABLE S4. SHRIMP U-PB DATA FOR ZIRCON IN META-DACITE SAMPLE 190615-4 FROM THE BEECHER FORMATION**

| Analysis No.                                     | U (ppm) | Th (ppm) | Th/U | $f_{206} (\%)^*$ | $^{207}\text{Pb}/^{206}\text{Pb}^\dagger$ | $\pm 1\sigma$ | $^{206}\text{Pb}/^{238}\text{U}$ | $\pm 1\sigma$ | $^{207}\text{Pb}/^{235}\text{U}$ | $\pm$ | $^{208}\text{Pb}/^{232}\text{Th}$ | $\pm 1\sigma$ | Disc. (%) <sup>§</sup> | $^{207}\text{Pb}/^{206}\text{Pb}$<br>Age (Ma) | $\pm 1\sigma$ |
|--------------------------------------------------|---------|----------|------|------------------|-------------------------------------------|---------------|----------------------------------|---------------|----------------------------------|-------|-----------------------------------|---------------|------------------------|-----------------------------------------------|---------------|
| <i>Age spreading from ca. 1850 Ma to 1780 Ma</i> |         |          |      |                  |                                           |               |                                  |               |                                  |       |                                   |               |                        |                                               |               |
| 1526I.1-1                                        | 493     | 180      | 0.37 | -0.02            | 0.1132                                    | 0.0008        | 0.325                            | 0.005         | 5.07                             | 0.08  | 0.090                             | 0.002         | 2                      | 1852                                          | 13            |
| 1527L.1-1                                        | 309     | 105      | 0.34 | 0.04             | 0.1132                                    | 0.0015        | 0.318                            | 0.005         | 4.96                             | 0.09  | 0.090                             | 0.002         | 4                      | 1851                                          | 23            |
| 1527B.1-1                                        | 287     | 96       | 0.34 | 0.00             | 0.1130                                    | 0.0014        | 0.319                            | 0.005         | 4.97                             | 0.09  | 0.087                             | 0.002         | 3                      | 1847                                          | 23            |
| 1527K.1-1                                        | 238     | 69       | 0.29 | -0.05            | 0.1129                                    | 0.0015        | 0.318                            | 0.005         | 4.95                             | 0.10  | 0.094                             | 0.003         | 3                      | 1846                                          | 25            |
| 1527H.1-1                                        | 389     | 173      | 0.45 | 0.06             | 0.1126                                    | 0.0013        | 0.316                            | 0.004         | 4.90                             | 0.08  | 0.082                             | 0.002         | 4                      | 1842                                          | 21            |
| 1527A.1-1                                        | 297     | 65       | 0.22 | 0.12             | 0.1115                                    | 0.0015        | 0.325                            | 0.005         | 5.00                             | 0.10  | 0.088                             | 0.003         | 0                      | 1823                                          | 25            |
| 1527J.1-1                                        | 244     | 64       | 0.26 | 0.10             | 0.1114                                    | 0.0016        | 0.322                            | 0.005         | 4.95                             | 0.10  | 0.086                             | 0.004         | 1                      | 1822                                          | 26            |
| 1527L.1-2                                        | 206     | 61       | 0.30 | 0.12             | 0.1113                                    | 0.0018        | 0.311                            | 0.005         | 4.77                             | 0.11  | 0.086                             | 0.003         | 4                      | 1821                                          | 29            |
| 1527K.1-2                                        | 426     | 144      | 0.34 | 0.18             | 0.1112                                    | 0.0014        | 0.306                            | 0.004         | 4.69                             | 0.08  | 0.081                             | 0.002         | 5                      | 1819                                          | 23            |
| 1527D.1-1                                        | 379     | 98       | 0.26 | -0.06            | 0.1107                                    | 0.0013        | 0.328                            | 0.005         | 5.01                             | 0.08  | 0.090                             | 0.002         | -1                     | 1812                                          | 21            |
| 1527F.1-1                                        | 358     | 109      | 0.31 | 0.18             | 0.1101                                    | 0.0015        | 0.316                            | 0.004         | 4.80                             | 0.09  | 0.088                             | 0.003         | 2                      | 1802                                          | 25            |
| 1527D.1-2                                        | 423     | 131      | 0.31 | 0.74             | 0.1098                                    | 0.0016        | 0.324                            | 0.004         | 4.91                             | 0.09  | 0.086                             | 0.005         | -1                     | 1797                                          | 27            |
| 1527A.1-2                                        | 322     | 132      | 0.41 | 0.08             | 0.1094                                    | 0.0014        | 0.317                            | 0.005         | 4.77                             | 0.09  | 0.081                             | 0.003         | 1                      | 1789                                          | 23            |
| 1527E.1-1                                        | 379     | 151      | 0.40 | 0.45             | 0.1087                                    | 0.0016        | 0.314                            | 0.004         | 4.71                             | 0.09  | 0.060                             | 0.003         | 1                      | 1778                                          | 27            |
| <i>Rejected analyses</i>                         |         |          |      |                  |                                           |               |                                  |               |                                  |       |                                   |               |                        |                                               |               |
| 1527I.1-1                                        | 299     | 112      | 0.37 | 0.00             | 0.1125                                    | 0.0014        | 0.309                            | 0.005         | 4.79                             | 0.09  | 0.063                             | 0.002         | 6                      | 1840                                          | 22            |
| 1527J.1-2                                        | 361     | 108      | 0.30 | 0.03             | 0.1124                                    | 0.0013        | 0.303                            | 0.004         | 4.70                             | 0.08  | 0.082                             | 0.002         | 7                      | 1839                                          | 22            |
| 1526J.1-1                                        | 391     | 204      | 0.52 | 0.98             | 0.1148                                    | 0.0023        | 0.189                            | 0.004         | 2.99                             | 0.09  | 0.033                             | 0.002         | 41                     | 1877                                          | 36            |
| 1526D.1-1                                        | 409     | 184      | 0.45 | 1.57             | 0.1151                                    | 0.0021        | 0.228                            | 0.006         | 3.61                             | 0.11  | 0.052                             | 0.003         | 30                     | 1882                                          | 32            |
| 1526B.1-1                                        | 298     | 118      | 0.40 | 1.23             | 0.1176                                    | 0.0021        | 0.247                            | 0.006         | 4.00                             | 0.11  | 0.065                             | 0.003         | 26                     | 1920                                          | 32            |
| 1526F.1-1                                        | 415     | 230      | 0.55 | 0.82             | 0.1141                                    | 0.0020        | 0.249                            | 0.005         | 3.92                             | 0.10  | 0.047                             | 0.002         | 23                     | 1866                                          | 32            |
| 1526H.1-1                                        | 292     | 138      | 0.47 | 0.11             | 0.1150                                    | 0.0012        | 0.262                            | 0.005         | 4.16                             | 0.09  | 0.055                             | 0.002         | 20                     | 1881                                          | 19            |
| 1526A.1-1                                        | 293     | 159      | 0.54 | 0.46             | 0.1130                                    | 0.0015        | 0.262                            | 0.006         | 4.09                             | 0.11  | 0.050                             | 0.002         | 19                     | 1848                                          | 24            |
| 1526E.1-1                                        | 300     | 90       | 0.30 | 0.45             | 0.1133                                    | 0.0013        | 0.281                            | 0.008         | 4.39                             | 0.13  | 0.074                             | 0.003         | 14                     | 1852                                          | 21            |
| 1526G.1-1                                        | 339     | 114      | 0.34 | 0.69             | 0.1136                                    | 0.0016        | 0.285                            | 0.008         | 4.46                             | 0.14  | 0.061                             | 0.003         | 13                     | 1858                                          | 25            |
| 1526F.2-1                                        | 272     | 90       | 0.33 | 0.92             | 0.1132                                    | 0.0017        | 0.285                            | 0.005         | 4.45                             | 0.10  | 0.077                             | 0.004         | 13                     | 1852                                          | 28            |

|           |      |     |      |      |        |        |       |       |      |      |       |       |    |      |    |
|-----------|------|-----|------|------|--------|--------|-------|-------|------|------|-------|-------|----|------|----|
| 1527C.1-1 | 296  | 292 | 0.99 | 0.84 | 0.1119 | 0.0023 | 0.269 | 0.004 | 4.16 | 0.10 | 0.031 | 0.002 | 16 | 1830 | 37 |
| 1527F.1-2 | 419  | 103 | 0.25 | 0.91 | 0.1121 | 0.0020 | 0.260 | 0.004 | 4.02 | 0.09 | 0.068 | 0.004 | 19 | 1833 | 33 |
| 1527G.1-1 | 345  | 153 | 0.44 | 1.10 | 0.1141 | 0.0030 | 0.234 | 0.005 | 3.68 | 0.12 | 0.049 | 0.003 | 27 | 1865 | 48 |
| 1527H.1-2 | 2134 | 435 | 0.20 | 2.00 | 0.1036 | 0.0033 | 0.156 | 0.004 | 2.23 | 0.09 | 0.063 | 0.005 | 45 | 1690 | 58 |

---

Footnotes as in Table S3.

---

**TABLE S5. SHRIMP U-PB DATA FOR MONAZITE IN META-DACITE SAMPLE 190615-4 FROM THE BEECHER FORMATION**

| Analysis No.                                                                                        | U (ppm) | Th (ppm) | Th/U | $f_{206}$ (%) <sup>*</sup> | $^{207}\text{Pb}/^{206}\text{Pb}^\dagger$ | $\pm 1\sigma$ | $^{206}\text{Pb}/^{238}\text{U}$ | $\pm 1\sigma$ | $^{207}\text{Pb}/^{235}\text{U}$ | $\pm 1\sigma$ | $^{208}\text{Pb}/^{232}\text{Th}$ | $\pm 1\sigma$ | Disc. (%) <sup>§</sup> | $^{207}\text{Pb}/^{206}\text{Pb}$ Age (Ma) | $\pm 1\sigma$ |
|-----------------------------------------------------------------------------------------------------|---------|----------|------|----------------------------|-------------------------------------------|---------------|----------------------------------|---------------|----------------------------------|---------------|-----------------------------------|---------------|------------------------|--------------------------------------------|---------------|
| <b><i>Main Age (<math>1775 \pm 25</math> Ma; <math>n = 10</math>, <math>MSWD = 0.27</math>)</i></b> |         |          |      |                            |                                           |               |                                  |               |                                  |               |                                   |               |                        |                                            |               |
| 1530E.2-1                                                                                           | 147     | 775      | 5.3  | 2.20                       | 0.1095                                    | 0.0043        | 0.281                            | 0.004         | 4.25                             | 0.18          | 0.079                             | 0.002         | -4                     | 1791                                       | 72            |
| 1530A.1-3                                                                                           | 353     | 516      | 1.5  | 0.64                       | 0.1093                                    | 0.0012        | 0.348                            | 0.015         | 5.24                             | 0.24          | 0.112                             | 0.007         | -8                     | 1787                                       | 20            |
| 1530A.2-2                                                                                           | 307     | 645      | 2.1  | 1.34                       | 0.1075                                    | 0.0027        | 0.283                            | 0.029         | 4.20                             | 0.44          | 0.113                             | 0.007         | 9                      | 1758                                       | 45            |
| 1530B.1-1r                                                                                          | 28      | 2357     | 84   | 1.86                       | 0.1093                                    | 0.0058        | 0.316                            | 0.015         | 4.77                             | 0.34          | 0.100                             | 0.006         | 1                      | 1788                                       | 96            |
| 1530D.1-1                                                                                           | 120     | 2828     | 24   | 1.30                       | 0.1091                                    | 0.0029        | 0.298                            | 0.005         | 4.48                             | 0.14          | 0.092                             | 0.002         | 6                      | 1785                                       | 49            |
| 1530D.1-4                                                                                           | 94      | 389      | 4.1  | 0.83                       | 0.1057                                    | 0.0041        | 0.332                            | 0.019         | 4.84                             | 0.34          | 0.105                             | 0.006         | -7                     | 1726                                       | 72            |
| 1530E.1-1                                                                                           | 598     | 814      | 1.4  | 1.36                       | 0.1087                                    | 0.0016        | 0.299                            | 0.004         | 4.49                             | 0.09          | 0.092                             | 0.002         | 5                      | 1778                                       | 27            |
| 1530F.1-1                                                                                           | 119     | 1715     | 14   | 2.42                       | 0.1094                                    | 0.0047        | 0.277                            | 0.007         | 4.18                             | 0.21          | 0.078                             | 0.001         | -4                     | 1790                                       | 78            |
| 1530G.1-1                                                                                           | 116     | 316      | 2.7  | 2.60                       | 0.1093                                    | 0.0041        | 0.309                            | 0.005         | 4.66                             | 0.19          | 0.092                             | 0.002         | 2                      | 1788                                       | 68            |
| 1530G.1-2                                                                                           | 95      | 2470     | 26   | 0.90                       | 0.1057                                    | 0.0024        | 0.310                            | 0.014         | 4.52                             | 0.23          | 0.113                             | 0.007         | -1                     | 1727                                       | 42            |
| <b><i>Outliers</i></b>                                                                              |         |          |      |                            |                                           |               |                                  |               |                                  |               |                                   |               |                        |                                            |               |
| 1530A.1-1                                                                                           | 95      | 10051    | 105  | 0.27                       | 0.0996                                    | 0.0027        | 0.264                            | 0.005         | 3.62                             | 0.12          | 0.077                             | 0.001         | -1                     | 1617                                       | 50            |
| 1530B.1-1                                                                                           | 69      | 881      | 13   | 0.46                       | 0.0922                                    | 0.0032        | 0.240                            | 0.005         | 3.05                             | 0.12          | 0.072                             | 0.001         | 1                      | 1471                                       | 66            |
| <b><i>Rejected analyses</i></b>                                                                     |         |          |      |                            |                                           |               |                                  |               |                                  |               |                                   |               |                        |                                            |               |
| 1530D.1-3                                                                                           | 80      | 353      | 4.4  | 2.31                       | 0.1065                                    | 0.0081        | 0.356                            | 0.034         | 5.24                             | 0.64          | 0.114                             | 0.007         | -13                    | 1740                                       | 139           |
| 1530D.1-5                                                                                           | 51      | 477      | 9.3  | 3.55                       | 0.1082                                    | 0.0056        | 0.355                            | 0.016         | 5.29                             | 0.36          | 0.104                             | 0.006         | -11                    | 1770                                       | 95            |
| 1530F.1-2                                                                                           | 226     | 1083     | 4.8  | 0.15                       | 0.0913                                    | 0.0012        | 0.283                            | 0.013         | 3.56                             | 0.17          | 0.095                             | 0.006         | -11                    | 1453                                       | 24            |
| 1530C.1-1                                                                                           | 158     | 526      | 3.3  | 1.02                       | 0.1108                                    | 0.0023        | 0.311                            | 0.007         | 4.76                             | 0.14          | 0.079                             | 0.001         | -14                    | 1813                                       | 38            |
| 1530I.2-2                                                                                           | 272     | 1487     | 5.5  | 0.93                       | 0.0935                                    | 0.0028        | 0.142                            | 0.010         | 1.84                             | 0.14          | 0.085                             | 0.005         | 43                     | 1497                                       | 57            |
| 1530I.1-1                                                                                           | 50      | 3886     | 77   | 3.10                       | 0.0984                                    | 0.0070        | 0.278                            | 0.006         | 3.78                             | 0.28          | 0.077                             | 0.001         | -5                     | 1594                                       | 134           |
| 1530I.2-1                                                                                           | 148     | 1185     | 8.0  | 3.15                       | 0.1217                                    | 0.0052        | 0.332                            | 0.006         | 5.57                             | 0.26          | 0.085                             | 0.002         | -12                    | 1982                                       | 76            |
| 1530I.3-1                                                                                           | 22      | 332      | 15   | 3.32                       | 0.0749                                    | 0.0097        | 0.283                            | 0.012         | 2.92                             | 0.40          | 0.080                             | 0.002         | -4                     | 1065                                       | 261           |
| 1530A.2-1                                                                                           | 63      | 6021     | 96   | 3.72                       | 0.0953                                    | 0.0080        | 0.276                            | 0.006         | 3.63                             | 0.32          | 0.075                             | 0.001         | -8                     | 1535                                       | 158           |
| 1530A.1-2                                                                                           | 67      | 580      | 8.6  | 3.76                       | 0.0949                                    | 0.0083        | 0.285                            | 0.006         | 3.73                             | 0.33          | 0.082                             | 0.002         | -1                     | 1526                                       | 164           |
| 1530B.1-2                                                                                           | 268     | 700      | 2.6  | 4.24                       | 0.1183                                    | 0.0052        | 0.315                            | 0.005         | 5.14                             | 0.24          | 0.087                             | 0.002         | -4                     | 1930                                       | 79            |
| 1530D.1-2                                                                                           | 106     | 1450     | 14   | 4.73                       | 0.1191                                    | 0.0071        | 0.326                            | 0.008         | 5.35                             | 0.35          | 0.087                             | 0.001         | -8                     | 1942                                       | 107           |
| 1530D.2-1                                                                                           | 59      | 6844     | 115  | 6.07                       | 0.1008                                    | 0.0092        | 0.305                            | 0.006         | 4.24                             | 0.40          | 0.087                             | 0.001         | -1                     | 1638                                       | 169           |

|           |    |      |    |       |        |        |       |       |      |      |       |       |     |      |     |
|-----------|----|------|----|-------|--------|--------|-------|-------|------|------|-------|-------|-----|------|-----|
| 1530A.1-3 | 77 | 2645 | 34 | 10.27 | 0.1355 | 0.0131 | 0.349 | 0.009 | 6.52 | 0.65 | 0.089 | 0.002 | -12 | 2171 | 169 |
|-----------|----|------|----|-------|--------|--------|-------|-------|------|------|-------|-------|-----|------|-----|

---

Footnotes as in Table S3.

---

**TABLE S6. SHRIMP U-PB DATA FOR ZIRCON IN THE DUNBAR GNEISS SAMPLE 190615-5**

| Analysis No.                                                                                                | U (ppm) | Th (ppm) | Th/U | $f_{206}$ (%) <sup>*</sup> | $^{207}\text{Pb}/^{206}\text{Pb}^\dagger$ | $\pm 1\sigma$ | $^{206}\text{Pb}/^{238}\text{U}$ | $\pm 1\sigma$ | $^{207}\text{Pb}/^{235}\text{U}$ | $\pm 1\sigma$ | $^{208}\text{Pb}/^{232}\text{Th}$ | $\pm 1\sigma$ | Disc. (%) <sup>§</sup> | $^{207}\text{Pb}/^{206}\text{Pb}$<br>Age (Ma) | $\pm 1\sigma$ |
|-------------------------------------------------------------------------------------------------------------|---------|----------|------|----------------------------|-------------------------------------------|---------------|----------------------------------|---------------|----------------------------------|---------------|-----------------------------------|---------------|------------------------|-----------------------------------------------|---------------|
| <i>Main group (<math>1845 \pm 7</math> Ma; <math>n = 17</math>, <math>\text{MSWD} = 1.02</math>)</i>        |         |          |      |                            |                                           |               |                                  |               |                                  |               |                                   |               |                        |                                               |               |
| 1611B.2-2                                                                                                   | 1133    | 332      | 0.29 | 0.04                       | 0.1142                                    | 0.0006        | 0.339                            | 0.008         | 5.33                             | 0.13          | 0.101                             | 0.003         | -1                     | 1867                                          | 10            |
| 1611H.1-4                                                                                                   | 402     | 141      | 0.35 | 0.23                       | 0.1139                                    | 0.0013        | 0.318                            | 0.008         | 5.00                             | 0.14          | 0.086                             | 0.003         | 4                      | 1863                                          | 21            |
| 1611E.1-1                                                                                                   | 382     | 165      | 0.43 | 0.18                       | 0.1138                                    | 0.0012        | 0.340                            | 0.008         | 5.33                             | 0.15          | 0.097                             | 0.004         | -1                     | 1861                                          | 19            |
| 1611H.1-5                                                                                                   | 514     | 241      | 0.47 | 0.13                       | 0.1137                                    | 0.0011        | 0.334                            | 0.009         | 5.24                             | 0.15          | 0.093                             | 0.003         | 0                      | 1860                                          | 17            |
| 1611A.2-1                                                                                                   | 1245    | 961      | 0.77 | 0.45                       | 0.1133                                    | 0.0008        | 0.350                            | 0.008         | 5.46                             | 0.14          | 0.099                             | 0.003         | -4                     | 1852                                          | 13            |
| 1611D.1-1                                                                                                   | 758     | 231      | 0.31 | 0.04                       | 0.1129                                    | 0.0007        | 0.334                            | 0.008         | 5.20                             | 0.13          | 0.089                             | 0.003         | -1                     | 1847                                          | 12            |
| 1612H.2-1                                                                                                   | 771     | 162      | 0.21 | 0.42                       | 0.1129                                    | 0.0013        | 0.320                            | 0.008         | 4.99                             | 0.13          | 0.110                             | 0.004         | 3                      | 1847                                          | 21            |
| 1612I.1-2                                                                                                   | 987     | 251      | 0.25 | 0.06                       | 0.1129                                    | 0.0007        | 0.320                            | 0.008         | 4.98                             | 0.13          | 0.090                             | 0.006         | 3                      | 1847                                          | 10            |
| 1612I.1-1                                                                                                   | 1262    | 364      | 0.29 | 0.02                       | 0.1128                                    | 0.0005        | 0.337                            | 0.008         | 5.24                             | 0.13          | 0.094                             | 0.003         | -1                     | 1845                                          | 9             |
| 1611H.1-1                                                                                                   | 640     | 113      | 0.18 | 0.48                       | 0.1126                                    | 0.0012        | 0.331                            | 0.008         | 5.14                             | 0.14          | 0.149                             | 0.006         | 0                      | 1842                                          | 19            |
| 1611K.1-1                                                                                                   | 1008    | 489      | 0.48 | 0.08                       | 0.1125                                    | 0.0006        | 0.344                            | 0.008         | 5.33                             | 0.13          | 0.100                             | 0.003         | -3                     | 1841                                          | 10            |
| 1611H.1-2                                                                                                   | 487     | 124      | 0.25 | 0.35                       | 0.1123                                    | 0.0013        | 0.318                            | 0.010         | 4.93                             | 0.17          | 0.110                             | 0.005         | 3                      | 1836                                          | 21            |
| 1612A.1-1                                                                                                   | 811     | 203      | 0.25 | 0.57                       | 0.1122                                    | 0.0012        | 0.320                            | 0.008         | 4.95                             | 0.13          | 0.119                             | 0.005         | 2                      | 1835                                          | 19            |
| 1611C.1-1                                                                                                   | 2174    | 1003     | 0.46 | 0.02                       | 0.1119                                    | 0.0010        | 0.338                            | 0.012         | 5.22                             | 0.19          | 0.096                             | 0.004         | -3                     | 1831                                          | 16            |
| 1612F.3-2                                                                                                   | 640     | 111      | 0.17 | 0.31                       | 0.1117                                    | 0.0014        | 0.329                            | 0.008         | 5.06                             | 0.14          | 0.107                             | 0.004         | 0                      | 1827                                          | 23            |
| 1611A.1-1                                                                                                   | 577     | 185      | 0.32 | 0.26                       | 0.1112                                    | 0.0012        | 0.306                            | 0.007         | 4.70                             | 0.13          | 0.091                             | 0.003         | 5                      | 1820                                          | 19            |
| 1611B.2-1                                                                                                   | 627     | 104      | 0.17 | 0.02                       | 0.1109                                    | 0.0008        | 0.339                            | 0.008         | 5.18                             | 0.13          | 0.099                             | 0.004         | -4                     | 1814                                          | 14            |
| <i>Subordinate group (<math>1783 \pm 14</math> Ma; <math>n = 5</math>, <math>\text{MSWD} = 0.16</math>)</i> |         |          |      |                            |                                           |               |                                  |               |                                  |               |                                   |               |                        |                                               |               |
| 1611H.1-3                                                                                                   | 345     | 128      | 0.37 | 0.27                       | 0.1099                                    | 0.0014        | 0.319                            | 0.008         | 4.84                             | 0.14          | 0.086                             | 0.004         | 1                      | 1798                                          | 22            |
| 1611C.2-1                                                                                                   | 1063    | 166      | 0.16 | 0.12                       | 0.1090                                    | 0.0007        | 0.317                            | 0.007         | 4.76                             | 0.12          | 0.165                             | 0.005         | 1                      | 1784                                          | 11            |
| 1611J.4-1                                                                                                   | 341     | 212      | 0.62 | 0.91                       | 0.1090                                    | 0.0019        | 0.317                            | 0.008         | 4.77                             | 0.15          | 0.084                             | 0.003         | 0                      | 1783                                          | 32            |
| 1612F.2-2                                                                                                   | 493     | 117      | 0.24 | 0.86                       | 0.1090                                    | 0.0016        | 0.324                            | 0.008         | 4.87                             | 0.14          | 0.098                             | 0.005         | -2                     | 1783                                          | 27            |
| 1612H.3-1                                                                                                   | 889     | 210      | 0.24 | 0.07                       | 0.1087                                    | 0.0007        | 0.322                            | 0.008         | 4.83                             | 0.12          | 0.092                             | 0.003         | -1                     | 1778                                          | 11            |
| <i>Rejected analyses</i>                                                                                    |         |          |      |                            |                                           |               |                                  |               |                                  |               |                                   |               |                        |                                               |               |
| 1612F.2-1                                                                                                   | 776     | 354      | 0.46 | 0.80                       | 0.1068                                    | 0.0014        | 0.331                            | 0.008         | 4.87                             | 0.14          | 0.090                             | 0.004         | -6                     | 1746                                          | 25            |
| 1612F.2-3                                                                                                   | 667     | 47       | 0.07 | 0.63                       | 0.1067                                    | 0.0014        | 0.339                            | 0.009         | 4.98                             | 0.15          | 0.076                             | 0.013         | -8                     | 1744                                          | 24            |
| 1611E.1-2                                                                                                   | 457     | 200      | 0.44 | 0.45                       | 0.1102                                    | 0.0017        | 0.344                            | 0.010         | 5.23                             | 0.18          | 0.099                             | 0.004         | -6                     | 1802                                          | 28            |

|            |      |      |      |      |        |        |       |       |      |      |       |       |    |      |    |
|------------|------|------|------|------|--------|--------|-------|-------|------|------|-------|-------|----|------|----|
| 1612B.2-1a | 2011 | 2241 | 1.11 | 0.00 | 0.0919 | 0.0010 | 0.233 | 0.009 | 2.96 | 0.12 | 0.061 | 0.003 | 8  | 1465 | 20 |
| 1611B.1-1  | 1999 | 530  | 0.27 | 0.03 | 0.1137 | 0.0005 | 0.357 | 0.009 | 5.59 | 0.14 | 0.099 | 0.003 | -6 | 1859 | 8  |
| 1612D.1-1  | 1603 | 1050 | 0.66 | 0.20 | 0.1134 | 0.0006 | 0.364 | 0.009 | 5.69 | 0.14 | 0.087 | 0.002 | -8 | 1855 | 9  |
| 1611H.5-1  | 1196 | 58   | 0.05 | 0.04 | 0.1134 | 0.0007 | 0.310 | 0.011 | 4.85 | 0.17 | 0.130 | 0.007 | 6  | 1854 | 11 |
| 1612A.1-2  | 784  | 97   | 0.12 | 0.42 | 0.1128 | 0.0010 | 0.306 | 0.007 | 4.75 | 0.12 | 0.103 | 0.005 | 7  | 1844 | 17 |
| 1611J.5-1  | 931  | 277  | 0.30 | 0.18 | 0.1122 | 0.0008 | 0.295 | 0.007 | 4.56 | 0.12 | 0.080 | 0.003 | 9  | 1836 | 13 |
| 1611J.1-1  | 1810 | 807  | 0.45 | 0.11 | 0.1122 | 0.0005 | 0.298 | 0.007 | 4.62 | 0.11 | 0.091 | 0.002 | 8  | 1836 | 9  |
| 1612B.2-2  | 845  | 108  | 0.13 | 0.08 | 0.1121 | 0.0012 | 0.307 | 0.010 | 4.75 | 0.16 | 0.089 | 0.005 | 6  | 1834 | 19 |
| 1612F.3-1  | 895  | 466  | 0.52 | 0.24 | 0.1109 | 0.0015 | 0.297 | 0.010 | 4.55 | 0.16 | 0.085 | 0.003 | 7  | 1814 | 24 |
| 1612G.1-1  | 797  | 133  | 0.17 | 0.39 | 0.1104 | 0.0010 | 0.282 | 0.007 | 4.29 | 0.11 | 0.108 | 0.004 | 11 | 1806 | 17 |
| 1611J.2-1  | 787  | 194  | 0.25 | 0.51 | 0.1092 | 0.0011 | 0.278 | 0.008 | 4.19 | 0.13 | 0.083 | 0.004 | 11 | 1787 | 19 |
| 1612G.1-2  | 876  | 92   | 0.11 | 0.85 | 0.1096 | 0.0012 | 0.278 | 0.007 | 4.20 | 0.11 | 0.255 | 0.011 | 12 | 1792 | 20 |
| 1611H.4-1  | 962  | 254  | 0.26 | 0.14 | 0.1110 | 0.0008 | 0.280 | 0.008 | 4.29 | 0.13 | 0.076 | 0.005 | 12 | 1816 | 14 |
| 1611C.1-2  | 1857 | 492  | 0.27 | 0.02 | 0.0996 | 0.0005 | 0.230 | 0.006 | 3.15 | 0.09 | 0.062 | 0.002 | 18 | 1616 | 9  |
| 1611H.6-1  | 778  | 315  | 0.41 | 0.09 | 0.1112 | 0.0008 | 0.257 | 0.006 | 3.94 | 0.11 | 0.063 | 0.002 | 19 | 1819 | 14 |
| 1611G.3-2  | 1114 | 428  | 0.38 | 0.10 | 0.1065 | 0.0007 | 0.236 | 0.006 | 3.47 | 0.09 | 0.069 | 0.002 | 21 | 1741 | 12 |
| 1612G.1-3  | 876  | 201  | 0.23 | 0.51 | 0.1116 | 0.0012 | 0.244 | 0.006 | 3.76 | 0.10 | 0.101 | 0.004 | 23 | 1826 | 19 |
| 1612C.1-1  | 1569 | 444  | 0.28 | 0.28 | 0.1079 | 0.0008 | 0.226 | 0.006 | 3.37 | 0.09 | 0.073 | 0.002 | 25 | 1764 | 14 |
| 1612F.4-1  | 694  | 170  | 0.24 | 0.56 | 0.1098 | 0.0021 | 0.230 | 0.009 | 3.47 | 0.15 | 0.085 | 0.005 | 26 | 1795 | 35 |
| 1612H.1-1  | 1129 | 170  | 0.15 | 0.60 | 0.1080 | 0.0011 | 0.212 | 0.005 | 3.16 | 0.08 | 0.091 | 0.005 | 30 | 1767 | 18 |
| 1612B.1-1  | 521  | 185  | 0.35 | 0.39 | 0.1066 | 0.0014 | 0.196 | 0.005 | 2.89 | 0.08 | 0.059 | 0.003 | 34 | 1743 | 24 |
| 1612D.2-1  | 1577 | 133  | 0.08 | 0.36 | 0.0996 | 0.0018 | 0.175 | 0.005 | 2.40 | 0.09 | 0.091 | 0.005 | 36 | 1617 | 34 |
| 1612F.1-1  | 1211 | 597  | 0.49 | 0.95 | 0.1008 | 0.0031 | 0.150 | 0.014 | 2.09 | 0.21 | 0.040 | 0.005 | 45 | 1639 | 57 |
| 1612B.2-1  | 2874 | 195  | 0.07 | 0.05 | 0.0818 | 0.0007 | 0.078 | 0.002 | 0.88 | 0.03 | 0.032 | 0.001 | 61 | 1241 | 16 |
| 1611G.3-1  | 912  | 266  | 0.29 | 1.10 | 0.1105 | 0.0015 | 0.300 | 0.007 | 4.57 | 0.13 | 0.114 | 0.005 | 6  | 1808 | 25 |
| 1611G.1-1  | 1590 | 863  | 0.54 | 1.23 | 0.0959 | 0.0018 | 0.122 | 0.003 | 1.62 | 0.06 | 0.033 | 0.002 | 52 | 1545 | 36 |
| 1611H.2-1  | 881  | 194  | 0.22 | 1.27 | 0.1082 | 0.0021 | 0.205 | 0.006 | 3.06 | 0.11 | 0.116 | 0.007 | 32 | 1769 | 35 |
| 1611G.2-1  | 1156 | 192  | 0.17 | 1.35 | 0.1085 | 0.0027 | 0.184 | 0.006 | 2.76 | 0.11 | 0.118 | 0.013 | 39 | 1774 | 46 |
| 1611H.7-1  | 585  | 135  | 0.23 | 1.47 | 0.1139 | 0.0020 | 0.284 | 0.008 | 4.46 | 0.15 | 0.139 | 0.007 | 14 | 1863 | 32 |
| 1611I.1-1  | 1930 | 1078 | 0.56 | 1.76 | 0.1130 | 0.0013 | 0.248 | 0.006 | 3.87 | 0.10 | 0.071 | 0.003 | 23 | 1848 | 21 |
| 1611H.3-1  | 904  | 266  | 0.29 | 2.14 | 0.1104 | 0.0019 | 0.288 | 0.007 | 4.38 | 0.13 | 0.098 | 0.005 | 10 | 1806 | 32 |



|           |      |     |      |      |        |        |       |       |      |      |       |       |    |      |    |
|-----------|------|-----|------|------|--------|--------|-------|-------|------|------|-------|-------|----|------|----|
| 1611J.3-1 | 1774 | 829 | 0.47 | 2.14 | 0.1002 | 0.0022 | 0.115 | 0.003 | 1.59 | 0.05 | 0.062 | 0.003 | 57 | 1628 | 41 |
| 1611K.2-1 | 942  | 317 | 0.34 | 2.69 | 0.1104 | 0.0034 | 0.258 | 0.006 | 3.92 | 0.16 | 0.167 | 0.009 | 18 | 1806 | 57 |

---

Footnotes as in Table S3.

---

**TABLE S7. SHRIMP U-PB DATA FOR ZIRCON IN THE NEWINGHAM TONALITE SAMPLE 190615-6**

| Analysis No.                                                                                 | U (ppm) | Th (ppm) | Th/U | $f_{206}$ (%) <sup>*</sup> | $^{207}\text{Pb}/^{206}\text{Pb}^\dagger$ | $\pm 1\sigma$ | $^{206}\text{Pb}/^{238}\text{U}$ | $\pm 1\sigma$ | $^{207}\text{Pb}/^{235}\text{U}$ | $\pm 1\sigma$ | $^{208}\text{Pb}/^{232}\text{Th}$ | $\pm 1\sigma$ | Disc. (%) <sup>§</sup> | $^{207}\text{Pb}/^{206}\text{Pb}$<br>Age (Ma) | $\pm 1\sigma$ |
|----------------------------------------------------------------------------------------------|---------|----------|------|----------------------------|-------------------------------------------|---------------|----------------------------------|---------------|----------------------------------|---------------|-----------------------------------|---------------|------------------------|-----------------------------------------------|---------------|
| <b>Main age (<math>1847 \pm 10</math> Ma, <math>n = 12</math>, <math>MSWD = 0.64</math>)</b> |         |          |      |                            |                                           |               |                                  |               |                                  |               |                                   |               |                        |                                               |               |
| 1618E.2-3                                                                                    | 398     | 117      | 0.29 | 0.91                       | 0.1159                                    | 0.0021        | 0.320                            | 0.008         | 5.11                             | 0.16          | 0.0947                            | 0.0054        | 5                      | 1894                                          | 32            |
| 1619H.1-1                                                                                    | 1048    | 768      | 0.73 | 0.22                       | 0.1144                                    | 0.0010        | 0.328                            | 0.004         | 5.17                             | 0.07          | 0.0908                            | 0.0013        | 2                      | 1871                                          | 16            |
| 1619H.1-4                                                                                    | 1179    | 377      | 0.32 | 0.35                       | 0.1136                                    | 0.0011        | 0.322                            | 0.004         | 5.05                             | 0.07          | 0.0875                            | 0.0028        | 3                      | 1859                                          | 18            |
| 1618E.1-1                                                                                    | 371     | 95       | 0.26 | 0.27                       | 0.1134                                    | 0.0018        | 0.325                            | 0.004         | 4.89                             | 0.10          | 0.0924                            | 0.0004        | 2                      | 1854                                          | 28            |
| 1619H.1-6                                                                                    | 1013    | 671      | 0.66 | 0.19                       | 0.1131                                    | 0.0011        | 0.320                            | 0.004         | 4.99                             | 0.07          | 0.0886                            | 0.0028        | 3                      | 1851                                          | 18            |
| 1618E.2-1                                                                                    | 1742    | 691      | 0.40 | 0.23                       | 0.1130                                    | 0.0012        | 0.337                            | 0.006         | 4.90                             | 0.10          | 0.1000                            | 0.0004        | -1                     | 1848                                          | 18            |
| 1619H.1-3                                                                                    | 1119    | 542      | 0.48 | 0.36                       | 0.1129                                    | 0.0011        | 0.319                            | 0.005         | 4.96                             | 0.09          | 0.0884                            | 0.0022        | 3                      | 1847                                          | 18            |
| 1619B.1-1                                                                                    | 1113    | 352      | 0.32 | 0.18                       | 0.1128                                    | 0.0010        | 0.328                            | 0.004         | 5.10                             | 0.07          | 0.0927                            | 0.0017        | 1                      | 1844                                          | 17            |
| 1618C.1-3                                                                                    | 1290    | 684      | 0.53 | 0.07                       | 0.1125                                    | 0.0007        | 0.332                            | 0.011         | 4.91                             | 0.16          | 0.0961                            | 0.0004        | 0                      | 1839                                          | 12            |
| 1619E.2-1                                                                                    | 497     | 212      | 0.43 | 0.06                       | 0.1123                                    | 0.0012        | 0.324                            | 0.004         | 5.01                             | 0.08          | 0.0919                            | 0.0017        | 2                      | 1837                                          | 19            |
| 1619F.1-1                                                                                    | 465     | 130      | 0.28 | 0.21                       | 0.1118                                    | 0.0014        | 0.319                            | 0.004         | 4.92                             | 0.08          | 0.0849                            | 0.0033        | 2                      | 1829                                          | 22            |
| 1619H.1-2                                                                                    | 996     | 744      | 0.75 | 0.49                       | 0.1118                                    | 0.0012        | 0.316                            | 0.004         | 4.87                             | 0.07          | 0.0877                            | 0.0015        | 3                      | 1829                                          | 20            |
| <b>Young outlier</b>                                                                         |         |          |      |                            |                                           |               |                                  |               |                                  |               |                                   |               |                        |                                               |               |
| 1619B.2-1                                                                                    | 1293    | 420      | 0.32 | 0.17                       | 0.1074                                    | 0.0009        | 0.303                            | 0.004         | 4.48                             | 0.07          | 0.0885                            | 0.0100        | 3                      | 1756                                          | 16            |
| <b>Rejected analyses</b>                                                                     |         |          |      |                            |                                           |               |                                  |               |                                  |               |                                   |               |                        |                                               |               |
| 1619H.1-5                                                                                    | 1176    | 372      | 0.32 | 0.36                       | 0.1129                                    | 0.0012        | 0.309                            | 0.004         | 4.81                             | 0.07          | 0.0861                            | 0.0020        | 6                      | 1846                                          | 19            |
| 1618E.2-2                                                                                    | 517     | 173      | 0.34 | 0.66                       | 0.1128                                    | 0.0014        | 0.309                            | 0.004         | 4.92                             | 0.09          | 0.0844                            | 0.0003        | 6                      | 1845                                          | 23            |
| 1618C.1-1                                                                                    | 659     | 176      | 0.27 | 0.10                       | 0.1117                                    | 0.0009        | 0.295                            | 0.004         | 4.87                             | 0.07          | 0.0875                            | 0.0004        | 9                      | 1827                                          | 15            |
| 1619G.1-1                                                                                    | 584     | 144      | 0.25 | 1.77                       | 0.1215                                    | 0.0023        | 0.328                            | 0.004         | 5.49                             | 0.12          | 0.1203                            | 0.0067        | 8                      | 1978                                          | 34            |
| 1619A.1-1                                                                                    | 478     | 146      | 0.31 | 1.50                       | 0.1161                                    | 0.0023        | 0.306                            | 0.004         | 4.90                             | 0.11          | 0.0972                            | 0.0058        | 9                      | 1898                                          | 36            |
| 1619C.1-1                                                                                    | 1022    | 452      | 0.44 | 0.01                       | 0.1105                                    | 0.0010        | 0.360                            | 0.004         | 5.49                             | 0.07          | 0.1113                            | 0.0077        | -10                    | 1807                                          | 17            |
| 1619E.1-1                                                                                    | 1934    | 700      | 0.36 | 0.22                       | 0.1135                                    | 0.0009        | 0.375                            | 0.007         | 5.87                             | 0.11          | 0.1081                            | 0.0023        | -11                    | 1856                                          | 15            |
| 1618C.1-2                                                                                    | 907     | 358      | 0.40 | 0.16                       | 0.1103                                    | 0.0014        | 0.278                            | 0.004         | 4.88                             | 0.10          | 0.0792                            | 0.0010        | 12                     | 1804                                          | 23            |
| 1618F.1-1                                                                                    | 1634    | 618      | 0.38 | 0.31                       | 0.0837                                    | 0.0006        | 0.180                            | 0.004         | 2.08                             | 0.05          | 0.0347                            | 0.0011        | 17                     | 1286                                          | 15            |
| 1618C.1-4                                                                                    | 1499    | 400      | 0.27 | 0.55                       | 0.0994                                    | 0.0012        | 0.202                            | 0.005         | 2.77                             | 0.07          | 0.0675                            | 0.0031        | 27                     | 1613                                          | 22            |
| 1618D.1-1                                                                                    | 1693    | 2368     | 1.40 | 0.47                       | 0.0864                                    | 0.0014        | 0.104                            | 0.004         | 4.89                             | 0.19          | 0.0105                            | 0.0001        | 53                     | 1347                                          | 31            |
| Footnotes as in Table S3.                                                                    |         |          |      |                            |                                           |               |                                  |               |                                  |               |                                   |               |                        |                                               |               |
